# Supplementary material for: Influenza epidemiology and influenza vaccine effectiveness during the 2014–2015 season: annual report from the Global Influenza Hospital Surveillance Network
Source: PubMed Central journal article supplement (PMC5001209; doi:10.1186/s12889-016-3378-1), 2016-08-22
Supplement: 12889_2016_3378_MOESM1_ESM.pdf [file 12889_2016_3378_MOESM1_ESM.pdf]

**Table S1. Characteristics of participating hospitals during the 2014–2015 season**

| Cities (Country)                    | Hospital                                         | Type of hospital                              | Total no. of beds | No. of beds monitored during study <sup>a</sup> | Type of wards monitored during study                               |
|-------------------------------------|--------------------------------------------------|-----------------------------------------------|-------------------|-------------------------------------------------|--------------------------------------------------------------------|
| St. Petersburg (Russian Federation) | City Infectious Diseases Hospital #30            | Infectious disease for adults                 | 300               | 300                                             | Adults (≥17 y)                                                     |
|                                     | Children's Infectious Diseases Hospital #5       | Multi-type hospital for children              | 650               | 0                                               | Infectious disease (0–16 y)                                        |
|                                     | Children's City Hospital #4                      | Multi-type hospital for children              | 370               | 0                                               | Infectious disease (0–16 y)                                        |
| Moscow (Russian Federation)         | Emergency Respiratory Infection City Hospital #1 | Viral infectious disease                      | 806               | 506                                             | Acute respiratory disease, paediatric, pregnant, ICU               |
| Prague (Czech Republic)             | Hospital na Bulovce, Prague                      | General hospital (former University hospital) | 1007              | 506                                             | Department of Infectious Disease respiratory diseases ward         |
| Istanbul, Ankara, Bursa (Turkey)    | Hacettepe Univ. Adult Hospital                   | University                                    | 561               | 116                                             | Acute medicine, emergency medicine                                 |
|                                     | Gazi Univ. Hospital                              | University                                    | 1068              | 229                                             | Adult emergency, infectious disease                                |
|                                     | Istanbul Faculty of Medicine                     | University                                    | 1353              |                                                 | Paediatrics: ICU, infectious, emergency, allergy                   |
|                                     | Uludağ University Paediatric Hospital            | University paediatric                         | 108               | 0                                               | All medical wards, ICU                                             |
|                                     | Dr. Lutfi Kirdar Kartal Research Hospital        | General, Training and research                | 750               | 180                                             | All medical wards, ICU                                             |
| Beijing (China)                     | Changping District Hospital                      | General                                       | 576               | 241                                             | Respiratory medicine, paediatrics, ICU                             |
|                                     | The First Hospital of Huairou                    | General                                       | 651               | 298                                             | Respiratory medicine, paediatrics, ICU                             |
|                                     | Daxing District Hospital                         | General                                       | 918               | 459                                             | Respiratory medicine, paediatrics, ICU                             |
|                                     | Miyun County Hospital                            | General                                       | 541               | 276                                             | Respiratory medicine, paediatrics, ICU                             |
| Valencia (Spain)                    | General de Castellón                             | General                                       | 580               | 451                                             | All medical wards, ICU                                             |
|                                     | La Plana                                         | General                                       | 201               | 100                                             | All medical wards, ICU                                             |
|                                     | Arnau de Vilanova                                | General                                       | 308               | 190                                             | All medical wards, ICU                                             |
|                                     | La Fe                                            | General                                       | 1013              | 316                                             | All medical wards, ICU                                             |
|                                     | Doctor Peset                                     | General                                       | 540               | 211                                             | All medical wards, ICU                                             |
|                                     | La Ribera                                        | General                                       | 301               | 110                                             | All medical wards, ICU                                             |
|                                     | San Juan                                         | General                                       | 350               | 230                                             | All medical wards, ICU                                             |
|                                     | Elda                                             | General                                       | 514               | 410                                             | All medical wards, ICU                                             |
|                                     | General Alicante                                 | General                                       | 758               | 376                                             | All medical wards, ICU                                             |
| Vinalopó                            | General                                          | 194                                           | 90                | All medical wards, ICU                          |                                                                    |
| Rio de Janeiro (Brazil)             | Hospital Albert Sabin                            | General (public)                              | 267               | 126                                             | Emergency, ICU, general pediatric, cardiology and pneumonia        |
|                                     | Hospital Quinta D'Or                             | General (private)                             | 350               | Not available                                   | General and pediatric ward, clinical and pediatric ICU             |
|                                     | Hospital de Clínicas                             | University                                    | 310               | Not available                                   | ICU, semi-intensive care unit (adult), pediatric emergency service |

<sup>a</sup> Medical beds excluding surgical beds
