# Supplementary material for: Influenza epidemiology and influenza vaccine effectiveness during the 2014–2015 season: annual report from the Global Influenza Hospital Surveillance Network
Source: PubMed Central journal article supplement (PMC5001209; doi:10.1186/s12889-016-3378-1), 2016-08-22
Supplement: 12889_2016_3378_MOESM2_ESM.pdf [file 12889_2016_3378_MOESM2_ESM.pdf]

**Table S2. Diagnoses and presenting complaints used to identify admissions possibly related with an influenza infection**

| Patients $\geq$ 5 years of age                                                                                 | ICD-9 Codes                                 | ICD-10 Codes                                                                                                                                                                                                                                                                  |
|----------------------------------------------------------------------------------------------------------------|---------------------------------------------|-------------------------------------------------------------------------------------------------------------------------------------------------------------------------------------------------------------------------------------------------------------------------------|
| Acute respiratory infection                                                                                    | 382.9; 460–466                              | J00–J06, J20–J22, H66.90                                                                                                                                                                                                                                                      |
| Acute myocardial infarction or acute coronary syndrome                                                         | 410–411 and 413–414                         | I20–I25.9                                                                                                                                                                                                                                                                     |
| Asthma                                                                                                         | 493–493.92                                  | J45.2–J45.22, J45.9–J45.998, J44–J44.9                                                                                                                                                                                                                                        |
| Heart failure                                                                                                  | 428–429.0                                   | I50–I50.9; I51.4                                                                                                                                                                                                                                                              |
| Pneumonia and influenza                                                                                        | 480–488                                     | J09–J18                                                                                                                                                                                                                                                                       |
| COPD                                                                                                           | 490, 491, 492, 496                          | J40–J44.9                                                                                                                                                                                                                                                                     |
| Myalgia                                                                                                        | 729.1                                       | M79.1                                                                                                                                                                                                                                                                         |
| Metabolic failure (diabetic coma, renal dysfunction, acid-base disturbances, alterations to the water balance) | 250.1–250.3; 584–586; 276–277               | E11.9, E10.9, E11.65, E10.65, E10.11, E11.01, E10.641, E11.641, E10.69, E11.00, E10.10, E11.69, N17.0, N17.1, N17.2, N17.8, N17.9, N18.1, N18.2, N18.3, N18.4, N18.5, N18.6 N18.9, N19, E87.0, E87.1, E87.2, E87.3, E87.4, E87.5, E87.6, E87.70, E87.71, E87.79, E86.0, E86.1 |
| Altered consciousness, convulsions, febrile convulsions                                                        | 780.01–780.02; 780.09; 780.31–780.32        | R40.20, R40.4, R40.0, R40.1, R56.00, R56.01                                                                                                                                                                                                                                   |
| Dyspnoea/respiratory abnormality                                                                               | 786.0                                       | R06.0, R06–R06.9                                                                                                                                                                                                                                                              |
| Respiratory abnormality                                                                                        | 786.00                                      | R06.9                                                                                                                                                                                                                                                                         |
| Shortness of breath                                                                                            | 786.05                                      | R06.02                                                                                                                                                                                                                                                                        |
| Respiratory abnormality nec                                                                                    | 786.09                                      | R06.3, R06.00, R06.09, R06.83                                                                                                                                                                                                                                                 |
| Respiratory symptoms/chest symptoms                                                                            | 786.9                                       | R06.89                                                                                                                                                                                                                                                                        |
| Fever or fever unknown origin or non-specified                                                                 | 780.6–780.60                                | R50, R50.9                                                                                                                                                                                                                                                                    |
| Cough                                                                                                          | 786.2                                       | R05                                                                                                                                                                                                                                                                           |
| Sepsis, systemic inflammatory response syndrome                                                                | 995.90–995.94                               | R65.10, R65.11, R65.20, A41.9                                                                                                                                                                                                                                                 |
| Patients 0–4 years of age                                                                                      | ICD 9 Codes                                 | ICD 10 Codes                                                                                                                                                                                                                                                                  |
| Acute upper or lower respiratory disease                                                                       | 382.9; 460–466                              | J00–J06, J20–J22                                                                                                                                                                                                                                                              |
| Dyspnoea, breathing anomaly, shortness of breath, tachypnea                                                    | 786.0; 786.00; 786.05–786.07; 786.09; 786.9 | R06.0, R06, R06.9, R06.3, R06.00, R06.09, R06.83, R06.02, R06.82, R06.2, R06.89                                                                                                                                                                                               |
| Asthma                                                                                                         | 493–493.92                                  | J45.2–J45.22, J45.9–J45.998, J44–J44.9                                                                                                                                                                                                                                        |
| Pneumonia and influenza                                                                                        | 480 to 488                                  | J09–J18                                                                                                                                                                                                                                                                       |
| Heart failure                                                                                                  | 428–429.0                                   | I50–I50.9; I51.4                                                                                                                                                                                                                                                              |
| Myalgia                                                                                                        | 729.1                                       | M79.1                                                                                                                                                                                                                                                                         |
| Altered consciousness, convulsions, febrile convulsions                                                        | 780.01–780.02; 780.09; 780.31–780.32        | R40.20, R40.4, R40.0, R40.1, R56.00, R56.01                                                                                                                                                                                                                                   |
| Fever or fever unknown origin or non-specified                                                                 | 780.6–780.60                                | R50, R50.9                                                                                                                                                                                                                                                                    |
| Cough                                                                                                          | 786.2                                       | R05                                                                                                                                                                                                                                                                           |
| Gastrointestinal manifestations                                                                                | 009.0; 009.3                                | A09.0; A09.9                                                                                                                                                                                                                                                                  |
| Sepsis, systemic inflammatory response syndrome                                                                | 995.90–995.94                               | R65.10, R65.11, R65.20, A41.9                                                                                                                                                                                                                                                 |

Admissions possibly related to influenza infection were based on Hayden FG, de Jong MD: Human influenza: Pathogenesis, clinical features, and management; In Webster RG, Monto AS, Braciale TJ, Lamb RA, editors. Textbook of Influenza. Chichester, West Sussex, UK, Wiley Blackwell, 2013; 374–391.
