# Supplementary material for: Influenza epidemiology and influenza vaccine effectiveness during the 2014–2015 season: annual report from the Global Influenza Hospital Surveillance Network
Source: PubMed Central journal article supplement (PMC5001209; doi:10.1186/s12889-016-3378-1), 2016-08-22
Supplement: 12889_2016_3378_MOESM3_ESM.pdf [file 12889_2016_3378_MOESM3_ESM.pdf]

**Table S3. Protocol application across sites**

| Characteristic                                                         | St. Petersburg (Russian Federation)                                                                                              | Moscow (Russian Federation)                                                    | Prague (Czech Republic)                                                                                                                   | Istanbul, Ankara, Bursa (Turkey)                                               | Beijing (China)                                                                | Valencia (Spain)                                                               | Rio de Janeiro (Brazil)                                                                                                                                                                             |
|------------------------------------------------------------------------|----------------------------------------------------------------------------------------------------------------------------------|--------------------------------------------------------------------------------|-------------------------------------------------------------------------------------------------------------------------------------------|--------------------------------------------------------------------------------|--------------------------------------------------------------------------------|--------------------------------------------------------------------------------|-----------------------------------------------------------------------------------------------------------------------------------------------------------------------------------------------------|
| Screening diagnosis                                                    | Admission diagnosis: influenza, acute respiratory illness, severe acute respiratory infections, pneumonia, croup, and bronchitis | Admission diagnosis possibly associated with an influenza infection (Table S2) | Admission diagnosis possibly associated with an influenza infection (Table S2)                                                            | Admission diagnosis possibly associated with an influenza infection (Table S2) | Admission diagnosis possibly associated with an influenza infection (Table S2) | Admission diagnosis possibly associated with an influenza infection (Table S2) | Admission diagnosis possibly associated with an influenza infection (Table S2)                                                                                                                      |
| Residency definition                                                   | Resident of St. Petersburg $\geq 6$ months                                                                                       | Resident of Moscow $\geq 6$ months and has not been away for more 1 month      | Permanent residence in Prague or Central Bohemian Region                                                                                  | Resident of the city where the hospital is located $\geq 6$ months             | Resident of the district of where the hospital is located $\geq 6$ months      | Pertaining to hospital catchment area and resident for $\geq 6$ months         | Resident of the region (Albert Sabin) or metropolitan area (Quinta d'Or) where the hospital is located; resident of the region where the hospital is located $\geq 6$ months (Hospital de Clinicas) |
| Recruited by                                                           | Doctors                                                                                                                          | Doctors, nurses, head of wards                                                 | Doctors, nurses                                                                                                                           | Doctors, resident doctors                                                      | Doctors, nurses                                                                | Full-time trained nurses                                                       | Doctors, nurses                                                                                                                                                                                     |
| Study start criteria                                                   | Week with $\geq 5$ laboratory-confirmed influenza cases                                                                          | One or more influenza positive cases in 2 consecutive weeks                    | $\geq 1$ positive patient per week for 2 consecutive weeks (November)                                                                     | 2 consecutive weeks with $\geq 1$ cases                                        | Defined by the national surveillance system                                    | 2 consecutive weeks with $\geq 2$ cases                                        | Entire year (Albert Sabin), not available (Hospital de Clinicas), 2 consecutive weeks with $\geq 2$ cases (Quinta d'Or)                                                                             |
| Study end criteria                                                     | Week with no laboratory-confirmed influenza cases                                                                                | Week with no laboratory-confirmed influenza cases                              | No influenza-positive patients during the previous 4 weeks or reaching of the maximum total number of patients per 2014–2015 study period | 2 consecutive weeks with no cases                                              | Defined by the national surveillance system                                    | 2 consecutive weeks with $< 3$ cases                                           | 2 consecutive weeks with no cases (Quinta d'Or, Hospital de Clinicas), not available (Albert Sabin)                                                                                                 |
| Actual study period (epidemiological weeks with flu cases ascertained) | 2015 wk 4 – 2015 wk 22                                                                                                           | 2015 wk 2 – 2015 wk 17                                                         | 2015 wk 2 – 2015 wk 16                                                                                                                    | 2015 wk 2 – 2015 wk 24                                                         | 2014 wk 40 – 2015 wk 17                                                        | 2014 wk 50 – 2015 wk 12                                                        | 2015 wk 1 to wk 52 (Albert Sabin), 2015 wk 10 to wk 39 (Quinta D'Or, Hospital de Clinicas)                                                                                                          |
