# Supplementary material for: Influenza epidemiology and influenza vaccine effectiveness during the 2014–2015 season: annual report from the Global Influenza Hospital Surveillance Network
Source: PubMed Central journal article supplement (PMC5001209; doi:10.1186/s12889-016-3378-1), 2016-08-22
Supplement: 12889_2016_3378_MOESM4_ESM.pdf [file 12889_2016_3378_MOESM4_ESM.pdf]

**Table S4. Types of vaccines available at each site**

| <b>Site</b>                        | <b>Vaccines available in 2014–2015</b>                                                                                              |
|------------------------------------|-------------------------------------------------------------------------------------------------------------------------------------|
| St. Petersburg, Russian Federation | Grippol “NPO Petrovax Farm” and “NPO Microgen”<br>Grippol – plus “NPO Petrovax Farm”<br>Vaxigrip<br>Begrivac<br>Fluarix<br>Influvac |
| Moscow, Russian Federation         | Grippol and Grippol plus<br>Influvir<br>Grippovac<br>Influvac                                                                       |
| Prague, Czech Republic             | Vaxigrip<br>Influvac                                                                                                                |
| Istanbul, Turkey                   | Vaxigrip<br>Fluarix                                                                                                                 |
| Beijing, China                     | Trivalent inactivated vaccines (mainly split virion and subunit)                                                                    |
| Valencia, Spain                    | Vaxigrip<br>Chiriomas<br>Optaflu                                                                                                    |
