# Supplementary material for: Influenza epidemiology and influenza vaccine effectiveness during the 2014–2015 season: annual report from the Global Influenza Hospital Surveillance Network
Source: PubMed Central journal article supplement (PMC5001209; doi:10.1186/s12889-016-3378-1), 2016-08-22
Supplement: 12889_2016_3378_MOESM5_ESM.pdf [file 12889_2016_3378_MOESM5_ESM.pdf]

**Table S5. Site heterogeneity in the risk of a positive influenza result in included admissions**

| <b>Recruiting site</b> | <b>Influenza-positive admissions</b> | <b>All admissions</b> | <b>% influenza positive</b> | <b>Crude OR</b> | <b>95% CI</b> | <b>Adjusted OR<sup>a</sup></b> | <b>95% CI</b> |
|------------------------|--------------------------------------|-----------------------|-----------------------------|-----------------|---------------|--------------------------------|---------------|
| All sites              | N=2177                               | N=9164                | 26.1                        | .               | .             | .                              | .             |
| St. Petersburg         | 602                                  | 2715                  | 22.2                        | 1.00            | .             | 1.00                           | ..            |
| Czech Republic         | 59                                   | 79                    | 74.7                        | 10.35           | 6.12-17.53    | 4.14                           | 2.42-7.10     |
| Turkey                 | 71                                   | 614                   | 11.6                        | 0.46            | 0.35-0.60     | 0.29                           | 0.22-0.39     |
| Beijing                | 273                                  | 1214                  | 24.3                        | 1.10            | 0.93-1.29     | 0.97                           | 0.80-1.17     |
| Valencia               | 737                                  | 3657                  | 20.2                        | 0.89            | 0.78-1.00     | 0.50                           | 0.41-0.60     |

OR, odds ratio. CI, confidence interval.

<sup>a</sup>Site effect adjusted by sex, age, comorbidity, hospitalization during the previous year, time to swab, and calendar time, with St. Petersburg as a reference
