# Supplementary material for: Influenza epidemiology and influenza vaccine effectiveness during the 2014–2015 season: annual report from the Global Influenza Hospital Surveillance Network
Source: PubMed Central journal article supplement (PMC5001209; doi:10.1186/s12889-016-3378-1), 2016-08-22

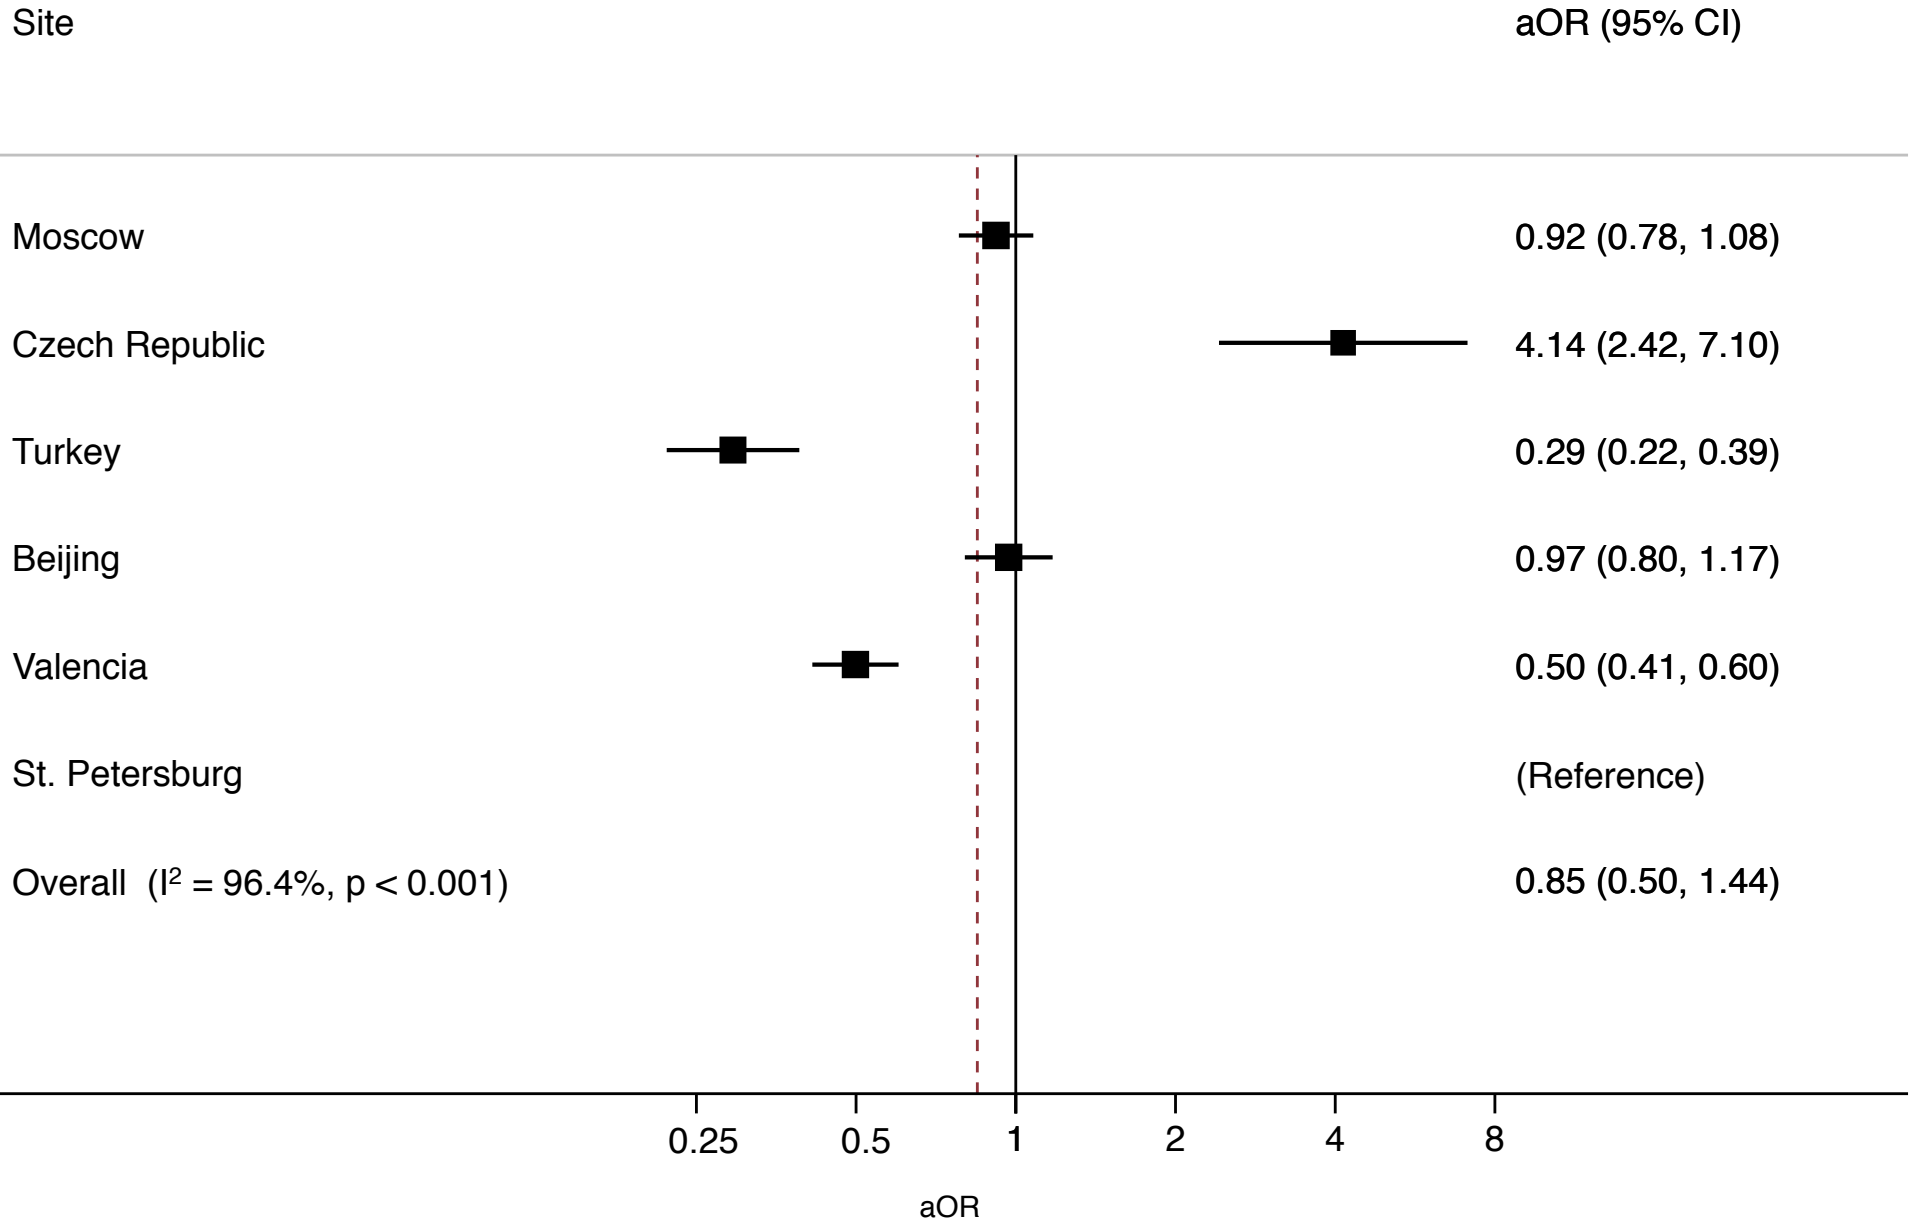

Supplement: 12889_2016_3378_MOESM6_ESM.pdf [file 12889_2016_3378_MOESM6_ESM.pdf]
