# Supplementary material for: Influenza epidemiology and influenza vaccine effectiveness during the 2014–2015 season: annual report from the Global Influenza Hospital Surveillance Network
Source: PubMed Central journal article supplement (PMC5001209; doi:10.1186/s12889-016-3378-1), 2016-08-22
Supplement: 12889_2016_3378_MOESM7_ESM.pdf [file 12889_2016_3378_MOESM7_ESM.pdf]

Age  
group (y) /  
Influenza strain

aOR (95% CI)      Positive

|                                              |  |                    |     |  |
|----------------------------------------------|--|--------------------|-----|--|
| 1-4                                          |  |                    |     |  |
| A(H3N2)                                      |  | 2.18 (1.64, 2.91)  | 212 |  |
| A(H1N1)pdm                                   |  | 1.97 (1.05, 3.71)  | 36  |  |
| B/Yamagata                                   |  | 2.27 (1.55, 3.31)  | 133 |  |
| Subtotal (I <sup>2</sup> = 0.0%, p = 0.933)  |  | 2.18 (1.76, 2.71)  |     |  |
| 5-17                                         |  |                    |     |  |
| A(H3N2)                                      |  | 3.85 (2.78, 5.35)  | 121 |  |
| A(H1N1)pdm                                   |  | 2.22 (1.03, 4.80)  | 14  |  |
| B/Yamagata                                   |  | 6.56 (4.40, 9.77)  | 118 |  |
| Subtotal (I <sup>2</sup> = 73.3%, p = 0.024) |  | 4.43 (3.48, 5.64)  |     |  |
| 18-49                                        |  |                    |     |  |
| A(H3N2)                                      |  | 2.83 (2.08, 3.85)  | 183 |  |
| A(H1N1)pdm                                   |  | 2.46 (1.22, 4.95)  | 28  |  |
| B/Yamagata                                   |  | 4.72 (3.20, 6.96)  | 169 |  |
| Subtotal (I <sup>2</sup> = 59.2%, p = 0.086) |  | 3.33 (2.65, 4.18)  |     |  |
| 50-64                                        |  |                    |     |  |
| A(H3N2)                                      |  | 3.49 (2.43, 5.02)  | 92  |  |
| A(H1N1)pdm                                   |  | 1.84 (0.69, 4.87)  | 9   |  |
| B/Yamagata                                   |  | 6.52 (4.12, 10.33) | 73  |  |
| Subtotal (I <sup>2</sup> = 72.5%, p = 0.026) |  | 4.14 (3.15, 5.45)  |     |  |
| 65-74                                        |  |                    |     |  |
| A(H3N2)                                      |  | 5.56 (3.88, 7.95)  | 153 |  |
| A(H1N1)pdm                                   |  | 1.18 (0.36, 3.87)  | 5   |  |
| B/Yamagata                                   |  | 5.70 (3.37, 9.63)  | 45  |  |
| Subtotal (I <sup>2</sup> = 67.8%, p = 0.045) |  | 5.11 (3.84, 6.81)  |     |  |
| 75-84                                        |  |                    |     |  |
| A(H3N2)                                      |  | 5.33 (3.78, 7.51)  | 235 |  |
| A(H1N1)pdm                                   |  | 1.58 (0.56, 4.48)  | 8   |  |
| B/Yamagata                                   |  | 3.67 (2.13, 6.33)  | 38  |  |
| Subtotal (I <sup>2</sup> = 62.4%, p = 0.070) |  | 4.42 (3.34, 5.85)  |     |  |
| >=85                                         |  |                    |     |  |
| A(H3N2)                                      |  | 5.20 (3.63, 7.44)  | 161 |  |
| A(H1N1)pdm                                   |  | 0.29 (0.03, 2.56)  | 1   |  |
| B/Yamagata                                   |  | 5.92 (3.35, 10.47) | 34  |  |
| Subtotal (I <sup>2</sup> = 71.2%, p = 0.031) |  | 5.10 (3.78, 6.89)  |     |  |

0.12 0.25 0.75 1 2 5 8

aOR

Age  
group (y) /  
Influenza strain

aOR (95% CI)

Positive

|                                              |  |                    |     |  |
|----------------------------------------------|--|--------------------|-----|--|
| 1-4                                          |  |                    |     |  |
| A(H3N2)                                      |  | 2.18 (1.64, 2.91)  | 212 |  |
| B/Yamagata                                   |  | 2.27 (1.55, 3.31)  | 133 |  |
| Subtotal (I <sup>2</sup> = 0.0%, p = 0.871)  |  | 2.21 (1.76, 2.78)  |     |  |
| 5-17                                         |  |                    |     |  |
| A(H3N2)                                      |  | 3.85 (2.78, 5.35)  | 121 |  |
| B/Yamagata                                   |  | 6.56 (4.40, 9.77)  | 118 |  |
| Subtotal (I <sup>2</sup> = 75.4%, p = 0.044) |  | 4.78 (3.71, 6.15)  |     |  |
| 18-49                                        |  |                    |     |  |
| A(H3N2)                                      |  | 2.83 (2.08, 3.85)  | 183 |  |
| B/Yamagata                                   |  | 4.72 (3.20, 6.96)  | 169 |  |
| Subtotal (I <sup>2</sup> = 75.7%, p = 0.043) |  | 3.45 (2.71, 4.38)  |     |  |
| 50-64                                        |  |                    |     |  |
| A(H3N2)                                      |  | 3.49 (2.43, 5.02)  | 92  |  |
| B/Yamagata                                   |  | 6.52 (4.12, 10.33) | 73  |  |
| Subtotal (I <sup>2</sup> = 77.1%, p = 0.037) |  | 4.44 (3.34, 5.91)  |     |  |
| 65-74                                        |  |                    |     |  |
| A(H3N2)                                      |  | 5.56 (3.88, 7.95)  | 153 |  |
| B/Yamagata                                   |  | 5.70 (3.37, 9.63)  | 45  |  |
| Subtotal (I <sup>2</sup> = 0.0%, p = 0.938)  |  | 5.60 (4.17, 7.53)  |     |  |
| 75-84                                        |  |                    |     |  |
| A(H3N2)                                      |  | 5.33 (3.78, 7.51)  | 235 |  |
| B/Yamagata                                   |  | 3.67 (2.13, 6.33)  | 38  |  |
| Subtotal (I <sup>2</sup> = 22.2%, p = 0.257) |  | 4.79 (3.58, 6.41)  |     |  |
| >=85                                         |  |                    |     |  |
| A(H3N2)                                      |  | 5.20 (3.63, 7.44)  | 161 |  |
| B/Yamagata                                   |  | 5.92 (3.35, 10.47) | 34  |  |
| Subtotal (I <sup>2</sup> = 0.0%, p = 0.707)  |  | 5.39 (3.98, 7.31)  |     |  |

0.12

0.25

0.75 1

2

5

8

aOR
