# Supplementary material for: Influenza epidemiology and influenza vaccine effectiveness during the 2014–2015 season: annual report from the Global Influenza Hospital Surveillance Network
Source: PubMed Central journal article supplement (PMC5001209; doi:10.1186/s12889-016-3378-1), 2016-08-22
Supplement: 12889_2016_3378_MOESM8_ESM.pdf [file 12889_2016_3378_MOESM8_ESM.pdf]

Comorbidity /

Influenza strain

aOR (95% CI)

Positive

One or more

A(H3N2)

1.40 (1.19, 1.65) 576

A(H1N1)pdm

1.01 (0.59, 1.73) 36

B/Yamagata

1.80 (1.45, 2.25) 201

Subtotal ( $I^2 = 62.8\%$ ,  $p = 0.068$ )

1.50 (1.32, 1.70)

0.5

1

2

5

aOR

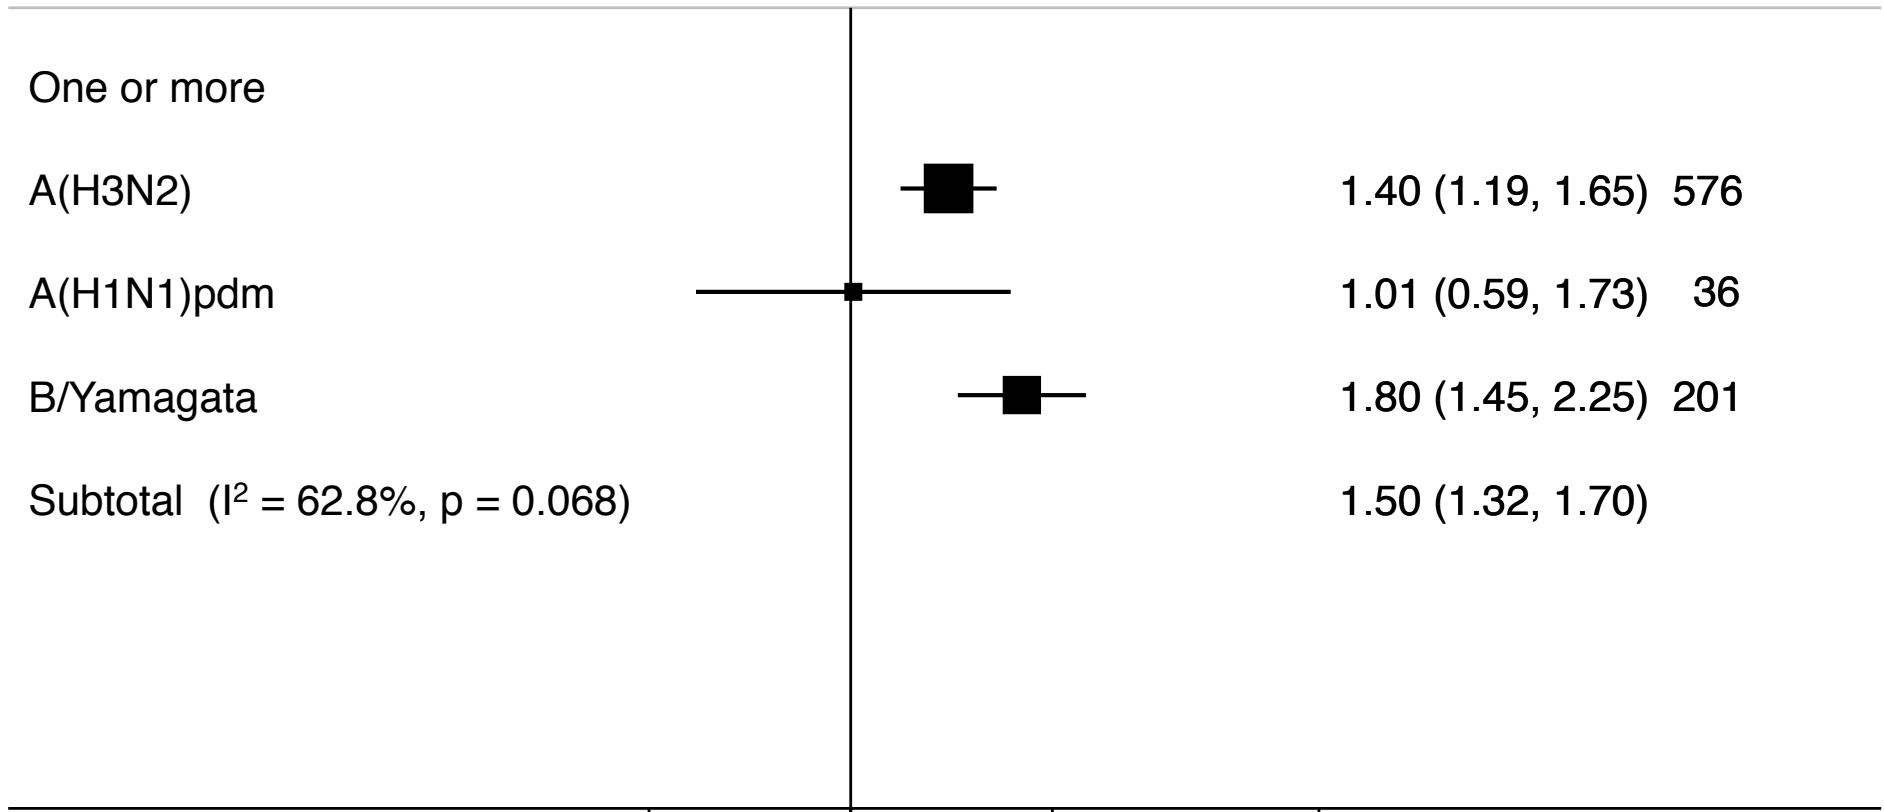

Comorbidity /

Influenza strain

aOR (95% CI)

Positive

One or more

A(H3N2)

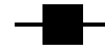

1.40 (1.19, 1.65)

576

B/Yamagata

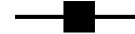

1.80 (1.45, 2.25)

201

Subtotal ( $I^2 = 68.9\%$ ,  $p = 0.073$ )

1.53 (1.34, 1.75)

0.5

1

2

5

aOR
