# Supplementary material for: Influenza epidemiology and influenza vaccine effectiveness during the 2014–2015 season: annual report from the Global Influenza Hospital Surveillance Network
Source: PubMed Central journal article supplement (PMC5001209; doi:10.1186/s12889-016-3378-1), 2016-08-22
Supplement: 12889_2016_3378_MOESM10_ESM.pdf [file 12889_2016_3378_MOESM10_ESM.pdf]

**Table S6. Predicted probability of admission with influenza for women 15 to 45 years of age**

| <b>Pregnancy status</b> | <b>Comorbidity</b> | <b>Probability (%)<sup>a</sup></b> | <b>95% CI</b> |
|-------------------------|--------------------|------------------------------------|---------------|
| Not pregnant            | No                 | 31.6                               | 25.2-38.1     |
|                         | Yes                | 32.9                               | 23.0-42.7     |
| First trimester         | No                 | 38.6                               | 37.6-39.5     |
|                         | Yes                | 80.5                               | 79.0-81.9     |
| Second trimester        | No                 | 44.1                               | 40.9-47.4     |
|                         | Yes                | 56.0                               | 50.6-61.5     |
| Third trimester         | No                 | 43.0                               | 39.4-46.5     |
|                         | Yes                | 55.2                               | 48.0-62.5     |

<sup>a</sup>Adjusted by social class, smoking habits, time to swab, calendar time, and the cluster effect of recruiting site
