# Supplementary material for: Influenza epidemiology and influenza vaccine effectiveness during the 2014–2015 season: annual report from the Global Influenza Hospital Surveillance Network
Source: PubMed Central journal article supplement (PMC5001209; doi:10.1186/s12889-016-3378-1), 2016-08-22
Supplement: 12889_2016_3378_MOESM14_ESM.pdf [file 12889_2016_3378_MOESM14_ESM.pdf]

**Table S7. Sensitivity analysis**

| Sensitivity analysis                              | Strain                                        | Age group | All          |            |               | Vaccine target group |            |               |
|---------------------------------------------------|-----------------------------------------------|-----------|--------------|------------|---------------|----------------------|------------|---------------|
|                                                   |                                               |           | Adjusted IVE | 95% CI     | P interaction | Adjusted IVE         | 95% CI     | P interaction |
| Exclusion of pregnant women                       | Any                                           | All ages  | -2           | -18 to 12  |               | 21                   | 8 to 33    |               |
|                                                   | H3N2                                          | All ages  | -7           | -26 to 10  |               | 20                   | 4 to 33    |               |
|                                                   | H1N1                                          | All ages  | 22           | -94 to 68  |               | 24                   | -92 to 70  |               |
|                                                   | B/Yamagata                                    | All ages  | 13           | -21 to 38  |               | 31                   | 2 to 51    |               |
|                                                   | Any                                           | <65 y     | -7           | -41 to 18  | 0.0589        | -5                   | -38 to 21  | 0.0583        |
|                                                   | H3N2                                          | ≥65 y     | 21           | 6 to 34    |               | 24                   | 8 to 37    |               |
|                                                   | H3N2                                          | <65 y     | -19          | -64 to 14  | 0.0246        | -17                  | -65 to 17  | 0.031         |
|                                                   | H1N1                                          | ≥65 y     | 24           | 7 to 38    |               | 25                   | 7 to 39    |               |
|                                                   | H1N1                                          | <65 y     | 9            | -196 to 72 | 0.9258        | 8                    | -201 to 72 | 0.7638        |
|                                                   | B/Yamagata                                    | ≥65 y     | 47           | -128 to 88 |               | 58                   | -81 to 90  |               |
|                                                   | B/Yamagata                                    | <65 y     | -1           | -63 to 37  | 0.1577        | 2                    | -60 to 40  | 0.2634        |
|                                                   | B/Yamagata                                    | ≥65 y     | 37           | 1 to 59    |               | 33                   | -7 to 58   |               |
|                                                   | Excluding vaccinated <14 d from illness onset | Any       | All ages     | -1         | -17 to 13     |                      | 21         | 8 to 33       |
| H3N2                                              |                                               | All ages  | -5           | -24 to 11  |               | 20                   | 4 to 33    |               |
| H1N1                                              |                                               | All ages  | 25           | -84 to 70  |               | 27                   | -82 to 71  |               |
| B/Yamagata                                        |                                               | All ages  | 16           | -17 to 40  |               | 31                   | 2 to 52    |               |
| Any                                               |                                               | <65 y     | -4           | -36 to 20  | 0.091         | -5                   | -38 to 21  | 0.0568        |
| Any                                               |                                               | ≥65 y     | 21           | 5 to 34    |               | 24                   | 9 to 37    |               |
| H3N2                                              |                                               | <65 y     | -15          | -58 to 17  | 0.037         | -16                  | -63 to 17  | 0.033         |
| H3N2                                              |                                               | ≥65 y     | 24           | 7 to 38    |               | 25                   | 7 to 39    |               |
| H1N1                                              |                                               | <65 y     | 18           | -167 to 75 | 0.998         | 15                   | -176 to 74 | 0.9906        |
| H1N1                                              |                                               | ≥65 y     | 18           | -210 to 78 |               | 32                   | -158 to 82 |               |
| B/Yamagata                                        |                                               | <65 y     | 7            | -50 to 42  | 0.257         | 3                    | -58 to 40  | 0.2724        |
| B/Yamagata                                        |                                               | ≥65 y     | 36           | 0 to 59    |               | 33                   | -7 to 58   |               |
| Vaccinated according to registration records only |                                               | Any       | All ages     | -6         | -22 to 9      |                      | 18         | 4 to 30       |
|                                                   | H3N2                                          | All ages  | -7           | -26 to 9   |               | 19                   | 2 to 32    |               |
|                                                   | H1N1                                          | All ages  | 7            | -131 to 63 |               | -                    | -          |               |
|                                                   | B/Yamagata                                    | All ages  | 2            | -37 to 30  |               | 25                   | -12 to 45  |               |
|                                                   | Any                                           | <65 y     | -17          | -56 to 12  | 0.0365        | -16                  | -55 to 14  | 0.0262        |
|                                                   | Any                                           | ≥65 y     | 18           | 2 to 31    |               | 22                   | 6 to 35    |               |
|                                                   | H3N2                                          | <65 y     | -25          | -77 to 11  | 0.0195        | -28                  | -84 to 11  | 0.0157        |
|                                                   | H3N2                                          | ≥65 y     | 22           | 5 to 36    |               | 24                   | 7 to 38    |               |
|                                                   | H1N1                                          | <65 y     | -11          | -265 to 66 | 0.8523        | -                    | -          |               |
|                                                   | H1N1                                          | ≥65 y     | 5            | -253 to 75 |               | -                    | -          |               |
|                                                   | B/Yamagata                                    | <65 y     | -16          | -90 to 29  | 0.1739        | -16                  | -91 to 30  | 0.2121        |
|                                                   | B/Yamagata                                    | ≥65 y     | 27           | -14 to 53  |               | 25                   | -19 to 52  |               |

Abbreviations: CI, confidence interval; IVE, influenza vaccine effectiveness
